# Supplementary material for: Incidence and immediate consequences of electrical shocks among Danish electricians: a cohort study
Source: HighWire-hosted journal article supplement (doi:10.1136/bmjopen-2020-046584), 2021-08-01
Supplement: bmjopen-2020-046584supp001_data_supplement.pdf [file bmjopen-2020-046584supp001_data_supplement.pdf]

Table 1: Content of the baseline (BL) and weekly follow-up (FU) questionnaires

| Dimension                                 | Number of items |    | Source (subscale) / Item                                                                                                                                                |
|-------------------------------------------|-----------------|----|-------------------------------------------------------------------------------------------------------------------------------------------------------------------------|
|                                           | BL              | FU |                                                                                                                                                                         |
| <i>Descriptives</i>                       |                 |    |                                                                                                                                                                         |
| Education                                 | 1               |    | What is your education?                                                                                                                                                 |
| Seniority                                 | 1               |    | How many years have you worked as an electrician?                                                                                                                       |
| Employment                                | 1               |    | Are you currently employed as an electrician?                                                                                                                           |
| Marital status                            | 1               |    | Married/single/widowed                                                                                                                                                  |
| <i>Health status</i>                      |                 |    |                                                                                                                                                                         |
| BMI                                       | 2               |    | Height and weight                                                                                                                                                       |
| Smoking                                   | 1               |    | Do you smoke?                                                                                                                                                           |
| Alcohol intake                            | 1               |    | How many standard drinks to you drink per week?                                                                                                                         |
| General health                            | 1               |    | In general, would you say your health is? (Excellent-Very good-Good-Fair-Poor)                                                                                          |
| Chronic diseases                          | 13              |    | Diabetes, epilepsy, neuritis, hypertension, metabolic disorder, tinnitus, migraine, cataract, anxiety, depression, PTSD, physical symptoms of unknown origin + symptoms |
| Symptoms after previous shock             | 2               |    | Have you previously experienced persistent symptoms after an electrical shock? + Describe                                                                               |
| Workability                               | 1               | 1  | How would you rate your current ability to work on a scale from 0 (not at all) to 10 (best)                                                                             |
| At work previous week                     |                 | 2  | Have you been at work the previous week? + Reason for not working                                                                                                       |
| <i>Health perceptions</i>                 |                 |    |                                                                                                                                                                         |
| Neuroticism                               | 12              |    | NEO-PI-R/NEO-FFI (neuroticism) <sup>10,11</sup>                                                                                                                         |
| Health anxiety                            | 8               |    | Whiteley Index (WI-7) <sup>12,13</sup> - one extra item added                                                                                                           |
| Self-efficacy                             | 6               |    | Copenhagen Psychosocial Questionnaire (Self-efficacy) <sup>14</sup>                                                                                                     |
| <i>Symptoms (in the past 7 days)</i>      |                 |    |                                                                                                                                                                         |
| Pain                                      | 2               | 2  | Have you felt pain or discomfort from any part of your body? / Which part?                                                                                              |
| Numbness/sensory disturbances             | 2               | 2  | Have you experienced numbness or sensory disturbance in any parts of your body? / Which part?                                                                           |
| Weakness                                  | 2               | 2  | Have you had a feeling of weakness in any parts of your body? / Which part?                                                                                             |
| Cramps and spasms                         | 2               | 2  | Have you had cramps or spasms in any parts of your body? / Which part?                                                                                                  |
| Tremors                                   | 2               | 2  | Have you experienced tremor in any parts of your body? / Which part?                                                                                                    |
| Sleep disturbances                        | 4               | 1  | Copenhagen Psychosocial Questionnaire (Sleeping difficulties) <sup>14</sup>                                                                                             |
| Cognitive difficulties                    | 4               | 1  | Copenhagen Psychosocial Questionnaire (Cognitive stress) <sup>14</sup>                                                                                                  |
| Fatigue                                   | 1               | 1  | Fatigue Assessment Scale (Physical) <sup>15</sup>                                                                                                                       |
| Anxiety                                   | 6               | 1  | Brief Symptom Inventory (Anxiety) <sup>16</sup>                                                                                                                         |
| Depression                                | 12              | 1  | Major Depression Inventory <sup>17</sup>                                                                                                                                |
| Severity of symptoms                      | 1               | 1  | How severe do you consider your symptoms to be?                                                                                                                         |
| Capability to handle symptoms             | 1               | 1  | How capable are you of handling the work-related consequences of your symptoms?                                                                                         |
| Tinnitus                                  |                 | 1  | Have you suffered from tinnitus?                                                                                                                                        |
| Migraine or headaches                     |                 | 1  | Have you suffered from migraine or headaches?                                                                                                                           |
| <i>Electrical shock</i>                   |                 |    |                                                                                                                                                                         |
| Exposure                                  | 2               | 2  | Have you suffered from an electrical shock during the last week? / Which date?                                                                                          |
| Shock characteristics                     | 11              | 11 | Type of electricity, voltage (2 questions), duration, no-let-go (2 questions), entry and exit point (including side, skincondition and cross body)                      |
| Consequences of the shock                 | 8               | 8  | Loss of consciousness, memory loss, physical injuries, secondary damage, discomfort, PTSD, medical assistance, absence from work                                        |
| Flashbacks                                | 2               | 2  | Have pictures of a traumatic event popped into your mind in the past 7 days? / Was the event an electrical shock?                                                       |
| Severity of electrical shock              | 1               | 1  | How severe do you consider the shock to be?                                                                                                                             |
| Capability to handle the electrical shock | 1               | 1  | How do you rate your chance of recovering from the shock and being fully able-bodied?                                                                                   |

10: Original: Costa PT, Jr., McCrae RR. Domains and facets: hierarchical personality assessment using the revised NEO personality inventory. J Pers Assess 1995 Feb;64(1):21-50 12\_item version: 11 McCrae RR, Costa JPT, Martin TA. The NEO-PI-3: A More Readable Revised NEO Personality Inventory. Journal of Personality Assessment 2005;84(3):261-70

12: Original: Pilowsky, I. I. (1967). Dimensions of hypochondriasis. British Journal of Psychiatry, 113, 89–93 7-item: 13: Fink P, Ewald H, Jensen J, Sørensen L, Engberg M, Holm M. Screening for somatization and hypochondriasis in primary care and neurological in-patients: a seven-item scale for hypochondriasis and somatization. J Psychosom Res 1999;46:261–73.

14: Pejtersen JH, Kristensen TS, Borg V, Bjørner JB. The second version of the Copenhagen Psychosocial Questionnaire. Scand J Public Health. 2010;38(3 Suppl):8-24. doi:10.1177/1403494809349858

15: Michielsen HJ, De Vries J, Van Heck GL. Psychometric qualities of a brief self-rated fatigue measure: The Fatigue Assessment Scale. J Psychosom Res. 2003;54(4):345-352. doi:10.1016/s0022-3999(02)00392-6

16: Derogatis, L. R. (1975). Brief Symptom Inventory. Clinical Psychometric Research: Baltimore

17: Olsen LR, Jensen DV, Noerholm V, Mariny K, Bech P. The internal and external validity of the Major Depression Inventory in measuring severity of depressive states. Psychol Med. 2003;33(2):351-356. doi:10.1017/s0033291702006724
